# Supplementary material
Source: Springer Nature journal article supplement (https://www.springermedizin.de/resource/supplementary/13063_2011_1048_MOESM1_ESM.pdf/9619258)
Supplement: MOESM1 [file 9619258]

360 patients being depressed for more than one year and giving informed consent to participate in the study

**ITT-level**

180 patients with clear preference either for PAT or CBT. Assigned to preference

180 depressed patients without preference and accept to be randomized either to PAT or to CBT.

90 CBT patients

90 PAT patients

90 CBT patients

90 PAT patients

**ATP-level**

60 CBT patients

60 PAT patients

60 CBT patients

60 PAT patients
